# Supplementary material for: Young Children Display Diurnal Patterns of Salivary IgA and Alpha-Amylase Expression Which Are Independent of Food Intake and Demographic Factors
Source: Hindawi journal article supplement (doi:10.1155/2019/3687416), 2019-01-14
Supplement: f1 [file 3687416.f1.pdf]

# **Young children display diurnal patterns of salivary IgA and alpha-amylase expression which are independent of food intake and demographic factors**

Lim P.W.1, Nambiar S.1, Muhardi L.1, Abdulkader U.1, Garssen J. 2,3, Sandalova E.1,2 \*

## **Supplementary materials**

Includes 4 figures and 8 tables.

### **Supplementary Figure 1**

Effect of sex, age and ethnicity (A) and weekend versus weekday (B) sampling on sAA and sIgA unusual diurnal pattern in toddlers.

### **Supplementary Figure 2**

Expression of sAA and sIgA in boys and girls in the morning and evening for two days.

### **Supplementary Figure 3**

Total protein expression in the saliva samples of morning and evening for day one and day two.

### **Supplementary Figure 4**

Body mass index of the children and sIgA (left) and sAA (right) expression in the morning and evening for both days.

Supplementary Figure 1

A

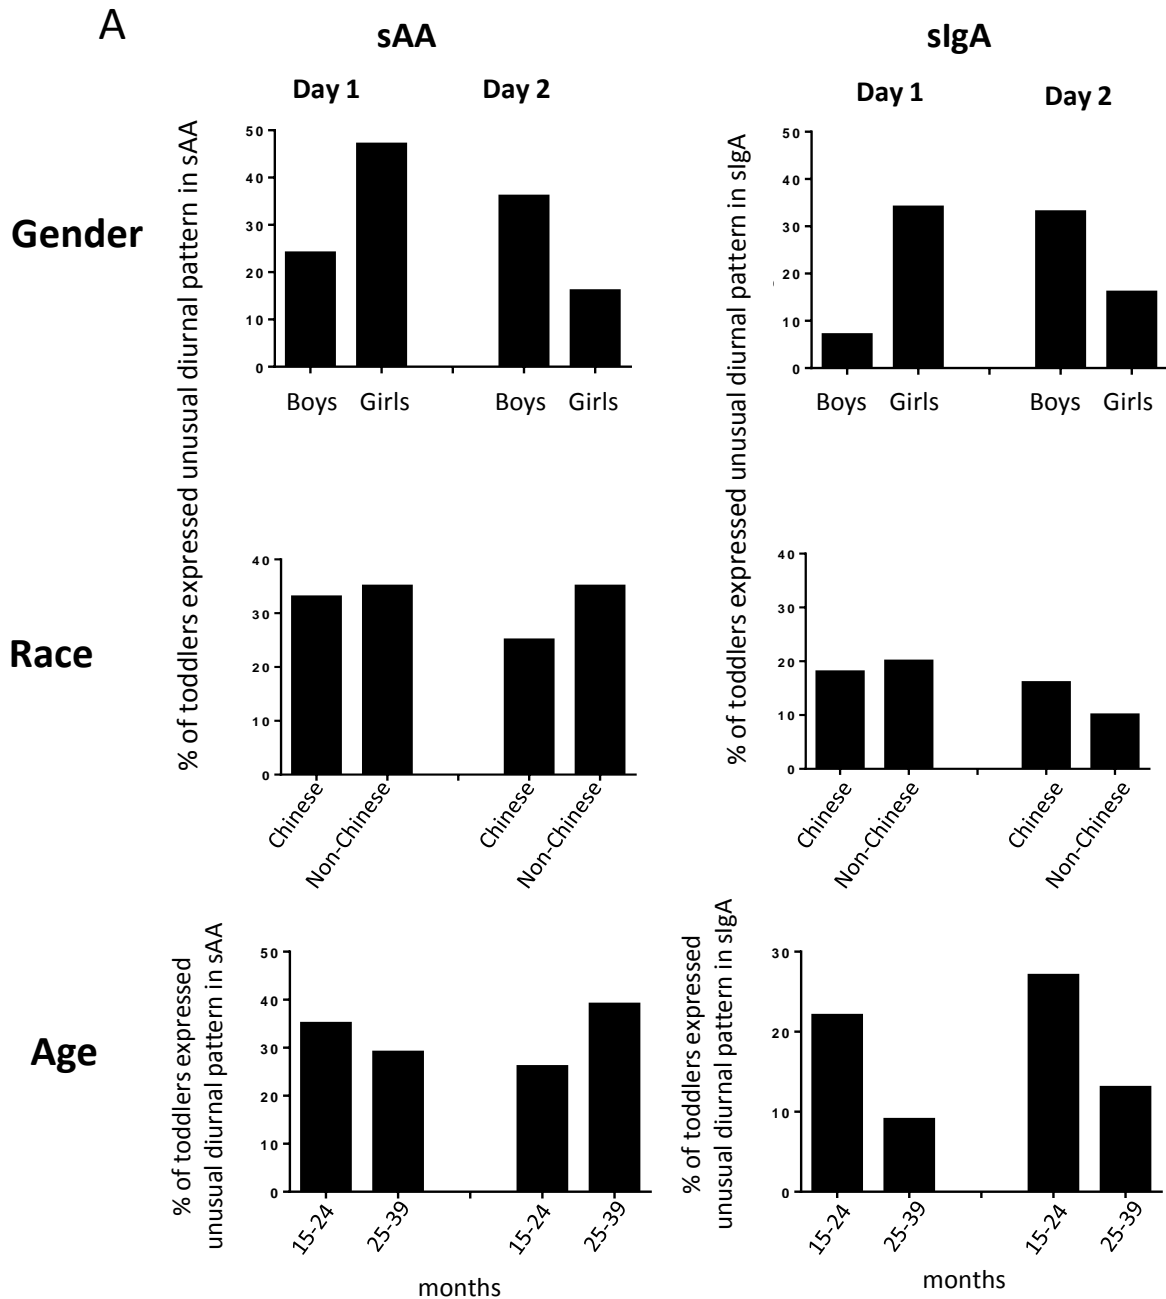

B

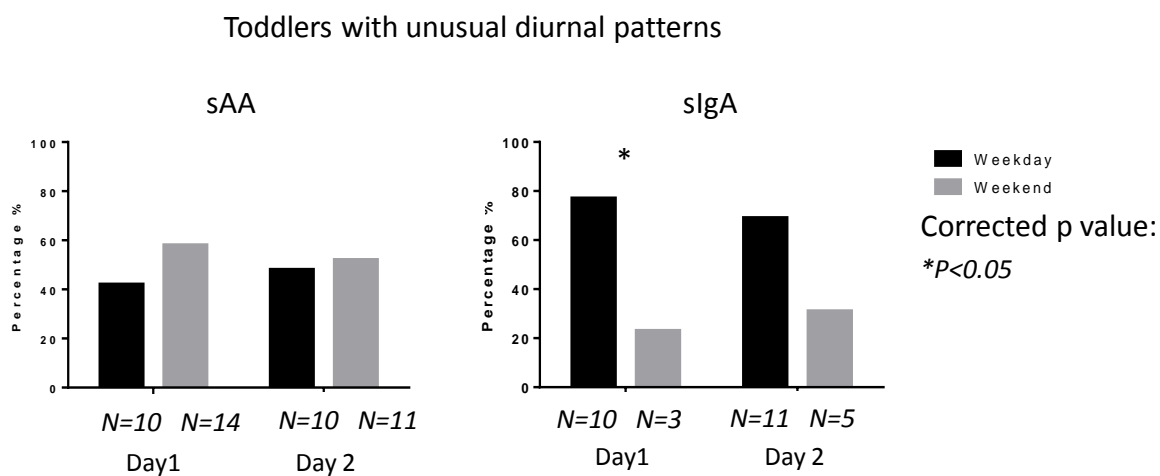

Supplementary figure 2

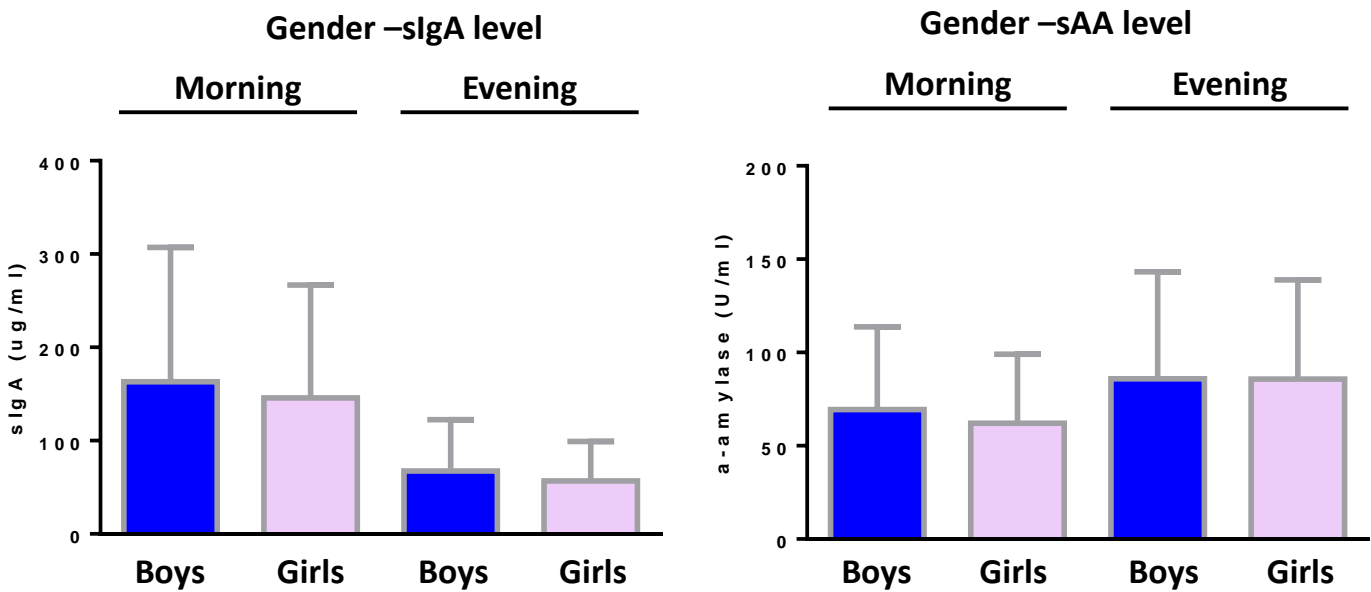

Supplementary Figure 3

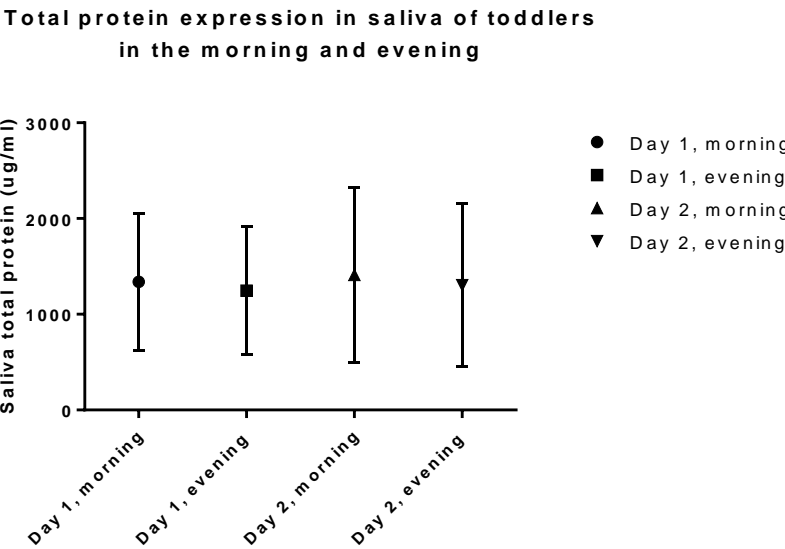

Supplementary Figure 4

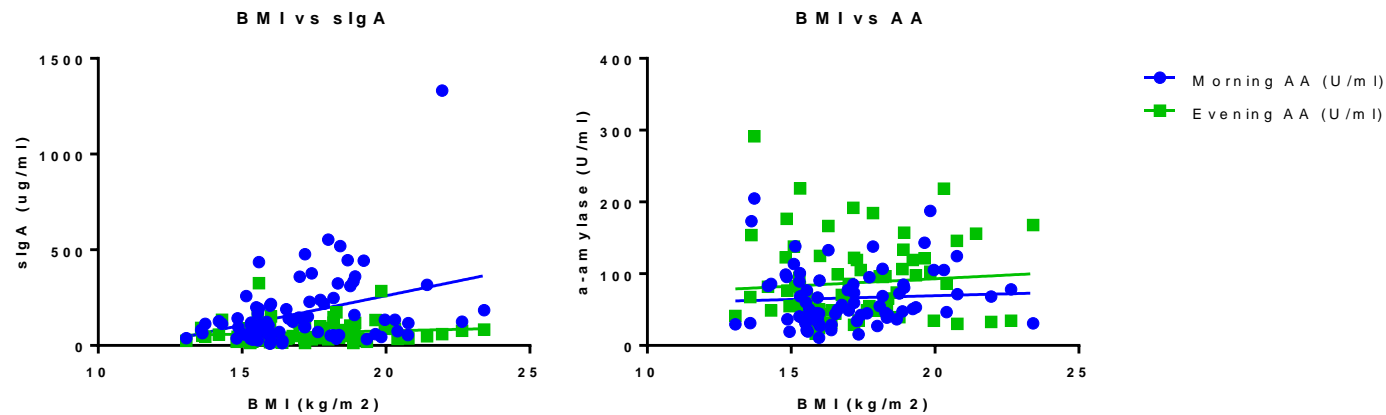

**Supplementary Table 1.** Adjusted R-square values for multiple regression model with predictors: Energy, Total Fat, Saturated Fat, Sugar, Carbohydrate, Protein, Dietary Fiber.  $\Delta$  sAA /  $\Delta$  slgA was derived by subtracting sAA am/ slgA am from sAA pm/ slgA pm values.

| Predictors       | Dependent Variables | adjusted R square |
|------------------|---------------------|-------------------|
| 7 Macronutrients | Day1 sAA am         | 0.053             |
|                  | Day1 sAA pm         | -0.003            |
|                  | Day2 sAA am         | 0.060             |
|                  | Day2 sAA pm         | -0.031            |
|                  | Day1 slgA am        | 0.068             |
|                  | Day1 slgA pm        | -0.045            |
|                  | Day2 slgA am        | 0.020             |
|                  | Day2 slgA pm        | -0.057            |
|                  | Day1 $\Delta$ sAA   | -0.037            |
|                  | Day2 $\Delta$ sAA   | -0.055            |
|                  | Day1 $\Delta$ slgA  | 0.010             |
|                  | Day2 $\Delta$ slgA  | -0.004            |

**Supplementary Table 2.** Adjusted R-square values for multiple regression model with predictors: Beta-carotene, Total Folate, Niacin, Retinol, Riboflavin, Thiamine, Vitamin A, Vitamin B12, Vitamin B6, Vitamin C, and Vitamin E.  $\Delta$  sAA /  $\Delta$  slgA was derived by subtracting sAA am/ slgA am from sAA pm/ slgA pm values.

| Predictors        | Dependent Variables | Adjusted R square |
|-------------------|---------------------|-------------------|
| 11 Micronutrients | Day1 sAA am         | -0.011            |
|                   | Day1 sAA pm         | -0.005            |
|                   | Day2 sAA am         | 0.100             |
|                   | Day2 sAA pm         | 0.051             |
|                   | Day1 slgA am        | -0.007            |
|                   | Day1 slgA pm        | -0.062            |
|                   | Day2 slgA am        | -0.104            |
|                   | Day2 slgA pm        | 0.058             |
|                   | Day1 $\Delta$ sAA   | -0.044            |
|                   | Day2 $\Delta$ sAA   | -0.050            |
|                   | Day1 $\Delta$ slgA  | 0.000             |
|                   | Day2 $\Delta$ slgA  | -0.081            |

**Supplementary Table 3.** Adjusted R-square values for multiple regression model with predictors: Calcium, Iodine, Iron, Magnesium, Phosphorus, Potassium, Selenium, Sodium, and Zinc.  $\Delta$  sAA /  $\Delta$  slgA was derived by subtracting sAA am/ slgA am from sAA pm/ slgA pm values.

| Predictors | Dependent Variables | Adjusted R square |
|------------|---------------------|-------------------|
| 9 Minerals | Day1 sAA am         | 0.02              |
|            | Day1 sAA pm         | -0.062            |
|            | Day2 sAA am         | 0.028             |
|            | Day2 sAA pm         | 0.043             |
|            | Day1 slgA am        | -0.068            |
|            | Day1 slgA pm        | 0.068             |
|            | Day2 slgA am        | -0.023            |
|            | Day2 slgA pm        | -0.011            |
|            | Day1 $\Delta$ sAA   | -0.056            |
|            | Day2 $\Delta$ sAA   | -0.088            |
|            | Day1 $\Delta$ slgA  | -0.041            |
|            | Day2 $\Delta$ slgA  | -0.070            |

**Supplementary Table 4.** Adjusted R-square values for multiple regression model with predictors: BMI, Ethnicity, Age, and Gender.  $\Delta$  sAA /  $\Delta$  slgA was derived by subtracting sAA am/ slgA am from sAA pm/ slgA pm values.

| Predictors                           | Dependent Variables | Adjusted R square |
|--------------------------------------|---------------------|-------------------|
| BMI, Ethnicity, Age (months), Gender | Day1 sAA am         | 0.038             |
|                                      | Day1 sAA pm         | 0.006             |
|                                      | Day2 sAA am         | 0.071             |
|                                      | Day2 sAA pm         | 0.020             |
|                                      | Day1 slgA am        | 0.003             |
|                                      | Day1 slgA pm        | -0.030            |
|                                      | Day2 slgA am        | 0.091             |
|                                      | Day2 slgA pm        | -0.014            |
|                                      | Day1 $\Delta$ sAA   | -0.031            |
|                                      | Day2 $\Delta$ sAA   | 0.042             |
|                                      | Day1 $\Delta$ slgA  | -0.002            |
|                                      | Day2 $\Delta$ slgA  | 0.072             |

**Supplementary Table 5.** slgA and sAA expression (in pg/ml) in morning and evening on two days in children who were reported by the parents to have eczema (N=16)

|   | Day1     |         | Day2     |         | Day1   |        | Day2   |        |
|---|----------|---------|----------|---------|--------|--------|--------|--------|
|   | slgA AM  | slgA PM | slgA AM  | slgA PM | sAA AM | sAA PM | sAA AM | sAA PM |
| 1 | 441750.3 | 31878.6 | 312800.6 | 32238.1 | 31.1   | 121.7  | 53.6   | 88.6   |
| 2 | 173858.4 | 33917.8 | 106326.3 | 45107.6 | 45.7   | 78.3   | 54.2   | 119.9  |
| 3 | 60966.6  | 27719.8 | 240224.3 | 57723.7 | 37.5   | 98.5   | 31.1   | 139.7  |

|              |          |          |          |          |       |       |       |       |
|--------------|----------|----------|----------|----------|-------|-------|-------|-------|
| 4            | 471842.6 | 18661.2  | 23159.8  | 219402.2 | 48.7  | 89.1  | 184.8 | 6.4   |
| 5            | 634003.9 | 32775.6  | 256196.4 | 66746.8  | 32.9  | 52.3  | 40.3  | 95.5  |
| 6            | 269030.0 | 19599.9  | 89767.2  | 27931.6  | 111.9 | 38.8  | 49.1  | 200.5 |
| 7            | 30361.9  | 11647.3  | 40960.9  | 14607.8  | 113.9 | 22.0  | 64.4  | 167.1 |
| 8            | 22382.2  | 18178.5  | 44312.9  | 19890.5  | 45.5  | 110.3 | 60.9  | 85.7  |
| 9            | 73242.2  | 38934.6  | 117511.2 | 35171.2  | 32.3  | 43.9  | 40.5  | 108.9 |
| 10           | 82396.7  | 98685.3  | 69161.9  | 27739.3  | 31.8  | 54.4  | 41.3  | 34.1  |
| 11           | 60167.3  | 29475.2  | 45743.3  | 266443.1 | 89.3  | 164.0 | 124.2 | 31.8  |
| 12           | 36593.3  | 37750.3  | 197987.2 | 35846.3  | 67.7  | 15.9  | 75.0  | 44.2  |
| 13           | 109652.9 | 16673.6  | 157213.7 |          | 22.6  | 124.3 | 75.2  |       |
| 14           | 288347.0 | 231605.9 | 46254.1  | 78005.9  | 26.9  | 56.2  | 17.5  |       |
| 15           | 244683.0 | 68942.4  | 625482.2 | 583324.7 | 19.0  | 46.9  | 54.4  | 56.0  |
| 16           | 53889.5  | 26185.7  | 51037.2  | 54029.2  | 68.3  | 87.8  | 41.3  | 105.5 |
|              |          |          |          |          |       |       |       |       |
| <b>Mean</b>  | 190823.0 | 46414.5  | 151508.7 | 104280.5 | 51.6  | 75.3  | 63.0  | 91.7  |
| <b>Stdev</b> | 186176.1 | 53941.7  | 154493.5 | 151380.9 | 30.3  | 41.1  | 40.3  | 54.7  |
|              |          |          |          |          |       |       |       |       |
| *            | *        |          |          |          |       |       |       |       |

\* - significant difference: Mann Whitney test was performed and significance was defined if  $p < 0.05$

**Supplementary Table 6.** slgA and sAA expression (in pg/ml) in morning and evening on two days in children who were reported by the parents to have asthma (N=17)

|              | Day1     |          | Day2     |          | Day1   |        | Day2   |        |
|--------------|----------|----------|----------|----------|--------|--------|--------|--------|
|              | slgA AM  | slgA PM  | slgA AM  | slgA PM  | sAA AM | sAA PM | sAA AM | sAA PM |
| 1            | 173858.4 | 33917.8  | 106326.3 | 45107.6  | 45.7   | 78.3   | 54.2   | 119.9  |
| 2            | 60966.6  | 27719.8  | 240224.3 | 57723.7  | 37.5   | 98.5   | 31.1   | 139.7  |
| 3            | 79095.3  | 39439.9  | 49555.2  | 39478.7  | 97.5   | 36.2   | 22.6   | 42.1   |
| 4            | 34001.9  | 53547.9  | 74025.2  | 28043.1  | 38.3   | 68.3   | 46.4   | 62.4   |
| 5            | 244571.7 | 104534.7 | 123787.1 | 62144.0  | 17.0   | 244.6  | 44.4   | 90.9   |
| 6            | 269030.0 | 19599.9  | 89767.2  | 27931.6  | 111.9  | 38.8   | 49.1   | 200.5  |
| 7            | 19086.8  | 15748.3  | 220212.7 | 30419.0  | 59.0   | 253.4  | 78.0   | 184.0  |
| 8            | 44410.5  | 38516.4  | 52975.0  | 102113.5 | 10.8   | 37.4   |        | 29.0   |
| 9            | 73242.2  | 38934.6  | 117511.2 | 35171.2  | 32.3   | 43.9   | 40.5   | 108.9  |
| 10           | 125232.3 | 61857.0  | 192941.7 | 69163.2  | 67.7   | 100.1  | 101.7  | 166.9  |
| 11           | 70722.1  | 11502.0  | 71674.8  | 65014.2  | 51.4   | 59.1   | 38.3   | 39.2   |
| 12           | 36593.3  | 37750.3  | 197987.2 | 35846.3  | 67.7   | 15.9   | 75.0   | 44.2   |
| 13           | 199112.5 | 59924.3  |          | 98990.6  | 27.5   | 64.2   | 34.2   | 80.4   |
| 14           | 111900.9 | 54523.2  | 510316.7 | 154907.0 | 72.6   | 11.0   |        | 68.3   |
| 15           | 30755.5  | 35485.9  | 221466.2 | 39402.1  | 107.8  | 82.6   | 67.8   | 66.7   |
| 16           | 391389.6 | 125243.0 | 329255.6 | 111648.2 | 85.8   | 167.9  | 75.0   | 146.6  |
| 17           | 37658.3  | 34409.1  | 75032.8  | 17198.3  | 104.4  | 120.7  | 122.5  | 155.1  |
|              |          |          |          |          |        |        |        |        |
| <b>Mean</b>  | 117742.8 | 46626.7  | 167066.2 | 60017.8  | 60.9   | 89.5   | 58.7   | 102.7  |
| <b>Stdev</b> | 104676.1 | 29599.8  | 122183.8 | 37174.6  | 32.2   | 71.7   | 27.8   | 54.8   |



|   |   |   |  |   |
|---|---|---|--|---|
|   |   |   |  |   |
| * | * | * |  | * |

\* - significant difference: Mann Whitney test was performed and significance was defined if  $p < 0.05$

**Supplementary Table 7.** slgA and sAA expression (in pg/ml) in morning and evening on two days in children who were reported by the parents to have food allergy (N=7)

|       | Day1     |         | Day2     |          | Day1   |        | Day2   |        |
|-------|----------|---------|----------|----------|--------|--------|--------|--------|
|       | slgA AM  | slgA PM | slgA AM  | slgA PM  | sAA AM | sAA PM | sAA AM | sAA PM |
| 1     | 441750.3 | 31878.6 | 312800.6 | 32238.1  | 31.1   | 121.7  | 53.6   | 88.6   |
| 2     | 173858.4 | 33917.8 | 106326.3 | 45107.6  | 45.7   | 78.3   | 54.2   | 119.9  |
| 3     | 103528.4 | 81284.6 | 144750.4 | 71889.8  | 119.3  | 44.6   | 37.0   | 24.6   |
| 4     | 34255.3  | 71818.2 | 75064.6  | 56442.0  | 101.9  | 28.8   | 79.0   | 58.0   |
| 5     | 32459.6  | 18744.3 | 43967.4  | 30085.8  | 36.9   | 32.6   | 22.4   | 49.6   |
| 6     | 44410.5  | 38516.4 | 52975.0  | 102113.5 | 10.8   | 37.4   |        | 29.0   |
| 7     | 441750.3 | 31878.6 | 312800.6 | 32238.1  | 31.1   | 121.7  | 53.6   | 88.6   |
|       |          |         |          |          |        |        |        |        |
| Mean  | 138377.1 | 46026.6 | 122647.4 | 56312.8  | 57.6   | 57.2   | 49.2   | 61.6   |
| Stdev | 158365.5 | 24721.9 | 100221.8 | 27325.3  | 43     | 36.3   | 21.2   | 36.7   |
|       |          |         |          |          |        |        |        |        |
| *     |          |         |          |          |        |        |        |        |

\* - significant difference: Mann Whitney test was performed and significance was defined if  $p < 0.05$

**Supplementary Table 8.** Mean morning and evening values of slgA and sAA expression for healthy children and children with parent-reported allergy.

| mean value           | Children with parent-reported allergy | Healthy children | P value, Mann-Whitney |
|----------------------|---------------------------------------|------------------|-----------------------|
| slgA AM day 1, ug/ml | 155837.2                              | 150898.9         | 0.9836                |
| slgA PM day1, ug/ml  | 46447.3 **                            | 55570.4 ##       | 0.1969                |
| slgA AM day 2, ug/ml | 153502.2                              | 153133.5         | 0.2022                |
| slgA PM day 2, ug/ml | 76904.9 **                            | 70583.0 ##       | 0.6300                |
| sAA AM day 1, U/ml   | 56.6                                  | 68.0             | 0.4654                |
| sAA PM day 1, U/ml   | 78.7                                  | 92.0 #           | 0.3960                |
| sAA AM day2, U/ml    | 59.3                                  | 69.6             | 0.7837                |
| sAA PM day2, U/ml    | 91.9 *                                | 82.9 #           | 0.3532                |

\* - indicate significant difference between AM and PM values for Children with parent-reported allergy, based on Mann-Whitney  $p < 0.05$  (\*) and  $p < 0.001$  (\*\*)

# - indicate significant difference between AM and PM values for Healthy children, based on Mann-Whitney  $p < 0.05$  (#) and  $p < 0.001$  (##)
